# Supplementary material for: Cardiac Damage in Degenerative Mitral Regurgitation Treated With Transcatheter Mitral Edge-to-Edge Repair
Source: PubMed Central journal article supplement — Circ Cardiovasc Interv. 2024 Apr 17;17(6):e013794. doi: 10.1161/CIRCINTERVENTIONS.123.013794 (PMC11177598; doi:10.1161/circinterventions.123.013794), 2024-04-17
Supplement: hcv-17-e013794-s001.pdf [file hcv-17-e013794-s001.pdf]

**Supplemental Figure 1. Two-year survival according to the extent of cardiac damage and residual MR**

**All-cause death**

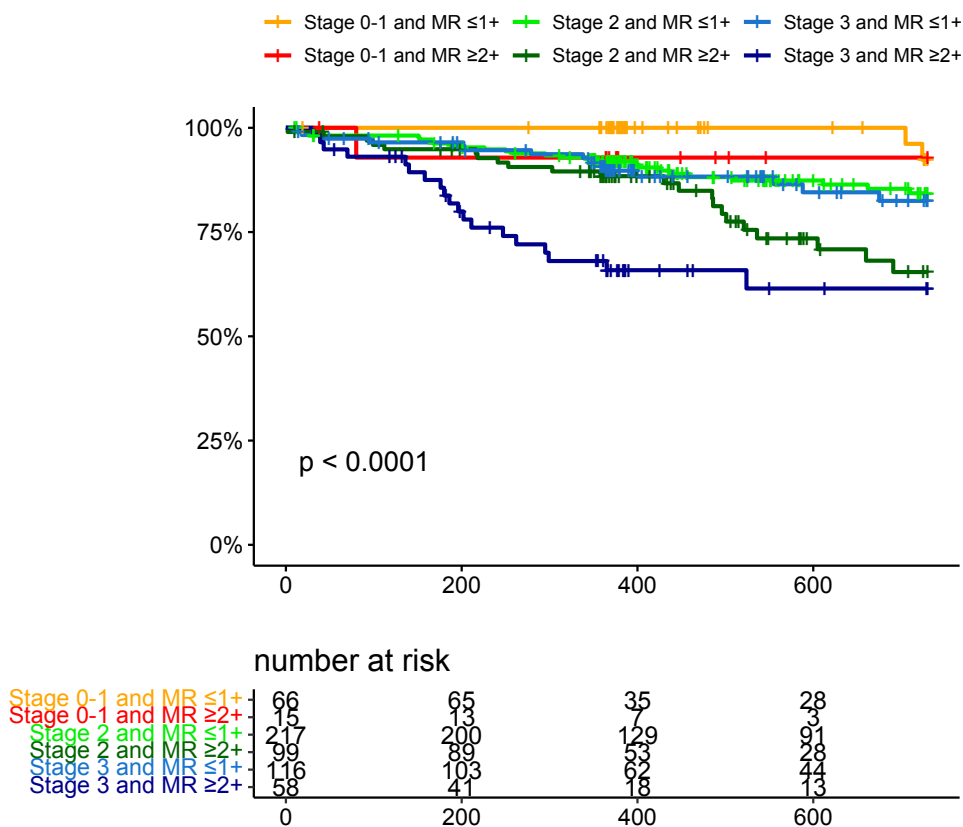

Shown are survival curves according to the extent of cardiac damage and residual MR. The superior outcomes of residual MR  $\geq 2+$  over residual MR  $\leq 1+$  was consistent amongst the staging of cardiac damage, while there was no significant difference in stage 0-1 with the limited sample size.

Abbreviation: MR, mitral regurgitation.

**Supplemental Table 1. Procedural findings**

|                                    | All<br>n=579    | Stage 0 or 1<br>n=84 | Stage 2<br>n=319 | Stage 3<br>n=176 | p value |
|------------------------------------|-----------------|----------------------|------------------|------------------|---------|
| Procedural time                    | 99 ± 47         | 95 ± 41              | 100 ± 48         | 99 ± 50          | 0.91    |
| Device time                        | 72 ± 44         | 65 ± 34              | 75 ± 45          | 71 ± 45          | 0.91    |
| Acute procedural success           | 529 (91.4)      | 79 (94.0)            | 289 (90.6)       | 161 (91.5)       | 0.64    |
| Number of devices (per patient)    | 833 (1.5 ± 0.6) | 113 (1.3 ± 0.5)      | 465 (1.5 ± 0.6)  | 255 (1.5 ± 0.6)  | 0.08    |
| Type of devices implanted          |                 |                      |                  |                  | 0.22    |
| MitraClipG2 NT                     | 627 (75.3)      | 84 (74.3)            | 359 (77.2)       | 184 (72.2)       |         |
| MitraClipG4 NT                     | 114 (13.7)      | 11 (9.7)             | 63 (13.5)        | 40 (15.6)        |         |
| MitraClipG4 NTW                    | 69 (8.2)        | 14 (12.5)            | 32 (6.9)         | 23 (9.0)         |         |
| MitraClipG4 XT                     | 9 (1.1)         | 0                    | 5 (1.1)          | 4 (1.6)          |         |
| MitraClipG4 XTW                    | 14 (1.7)        | 4 (3.5)              | 6 (1.3)          | 4 (1.6)          |         |
| TPMG                               | 2.1 ± 1.3       | 3.1 ± 1.3            | 3.2 ± 1.8        | 3.0 ± 1.4        | 0.19    |
| MR ≤mild after device implantation | 399 (68.9)      | 66 (81.5)            | 217 (68.7)       | 116 (66.7)       | 0.035   |
| Emergency surgery                  | 3 (0.5)         | 0                    | 2 (0.6)          | 1 (0.6)          | 0.64    |
| Acute kidney injury                | 8 (1.4)         | 1 (1.2)              | 2 (0.6)          | 5 (2.8)          | 0.14    |
| Length of hospital stay            | 12 [8, 23]      | 9 [7, 15]            | 11 [7, 20]       | 16 [9, 30]       | <0.001  |

Values are either the number with %, mean ± SD, or median [interquartile range].

**Abbreviations:** TMPG, transmitral pressure gradient; MR, mitral regurgitation.

**Supplemental Table 2. Factors of cardiac damage and residual MR after TEER**

|                           | <b>Odds ratio</b> | <b>95%CI</b> | <b>p value</b> |
|---------------------------|-------------------|--------------|----------------|
| LV end-diastolic diameter | 1.01              | 0.95-1.07    | 0.78           |
| LV end-systolic diameter  | 1.06              | 0.99-1.14    | 0.09           |
| LV ejection fraction      | 1.02              | 0.99-1.06    | 0.20           |
| LA volume index           | 1.01              | 1.00-1.01    | 0.004          |
| Atrial fibrillation       | 1.26              | 0.75-2.14    | 0.38           |
| TR severe                 | 1.18              | 0.52-2.66    | 0.70           |
| TAPSE                     | 1.01              | 0.97-1.06    | 0.57           |
| RVFAC                     | 0.99              | 0.96-1.01    | 0.24           |

**Abbreviations:** TEER, transcatheter edge-to-edge repair; CI, confidence interval; LV, left ventricular; LA, left atrium; TR, tricuspid regurgitation; TAPSE, tricuspid annular plane systolic excursion; RVFAC, right ventricular fractional area change.

**Supplemental Table 3. Association of cardiac damage factors with two-year mortality**

|                           | <b>Hazard ratio</b> | <b>95%CI</b> | <b>p value</b> |
|---------------------------|---------------------|--------------|----------------|
| LV end-diastolic diameter |                     |              |                |
| ≤55 mm                    |                     | Reference    |                |
| 56 – 60 mm                | 0.71                | 0.37 – 1.34  | 0.29           |
| >60 mm                    | 1.27                | 0.68 – 2.34  | 0.46           |
| LV end-systolic diameter  |                     |              |                |
| ≤35 mm                    |                     | Reference    |                |
| 36 – 40 mm                | 0.67                | 0.34 – 1.31  | 0.24           |
| >40 mm                    | 1.43                | 0.85 – 2.41  | 0.17           |
| LV ejection fraction      |                     |              |                |
| >60%                      |                     | Reference    |                |
| 51 – 60%                  | 1.37                | 0.82 – 2.28  | 0.24           |
| ≤50%                      | 2.60                | 1.55 – 4.34  | <0.001         |
| LA volume index           |                     |              |                |
| <40 ml/m <sup>2</sup>     |                     | Reference    |                |
| 40 – 59 ml/m <sup>2</sup> | 2.08                | 0.27 – 16.22 | 0.49           |
| ≥60 ml/m <sup>2</sup>     | 3.83                | 0.53 – 27.56 | 0.18           |
| Atrial fibrillation       |                     |              |                |
| No                        |                     | Reference    |                |
| Yes                       | 1.63                | 1.02 – 2.59  | 0.039          |
| Tricuspid regurgitation   |                     |              |                |
| ≤moderate                 |                     | Reference    |                |
| severe                    | 1.50                | 0.81 – 2.75  | 0.19           |
| TAPSE                     |                     |              |                |
| ≥13 mm                    |                     | Reference    |                |
| <13mm                     | 1.68                | 1.00 – 2.80  | 0.048          |
| RVFAC                     |                     |              |                |
| ≥28 %                     |                     | Reference    |                |
| <28 %                     | 1.78                | 0.91 – 3-45  | 0.08           |

---

**Abbreviations:** TEER, transcatheter edge-to-edge repair; CI, confidence interval; LV, left ventricular; LA, left atrium; TR, tricuspid regurgitation; TAPSE, tricuspid annular plane systolic excursion; RVFAC, right ventricular fractional area change.

---
